# Supplementary material for: Surface modulus reconstruction toward robust flexible perovskite solar cells
Source: Royal Society of Chemistry journal article supplement (doi:10.1039/d3ta02692b), 2023-01-01
Supplement: d3ta02692b1.pdf [file d3ta02692b1.pdf]

## Supporting Information

Surface Modulus Reconstruction toward Robust Flexible Perovskite Solar Cells

Zheng Lu <sup>a,#</sup>, Xiaoli Xu <sup>c,#</sup>, Yanhui Lou <sup>b,\*</sup>, Lingbo Xiao <sup>b</sup>, Jie Zhao <sup>b</sup>, Shuai Zou <sup>a</sup>,

Yingzhuang Ma <sup>a,d</sup>, Lutao Li <sup>b</sup>, Chen Wang <sup>b</sup>, Xiaodong Su <sup>a,\*</sup>, Guifu Zou <sup>b,\*</sup>

<sup>a</sup> School of Physical Science and Technology, Jiangsu Key Laboratory of Thin Films, Soochow University, Suzhou 215006, China.

<sup>b</sup> Key Laboratory of Advanced Carbon Materials and Wearable Energy Technologies of Jiangsu Province, College of Energy, Soochow University, Suzhou 215006, China.

<sup>c</sup> College of Materials and Chemistry, China Jiliang University, Hangzhou 310018, China.

<sup>d</sup> School of Optical and Electronic Information, Suzhou City University, Suzhou, Jiangsu 215104, China

# These authors contributed equally to this work.

\* Corresponding authors

E-mail addresses: yhlou@suda.edu.cn (Y. Lou), xdsu@suda.edu.cn (X. Su), zougufu@suda.edu.cn (G. Zou).

## **Experimental section**

### **Materials:**

All the purchased materials were used as received without further purification. Cesium iodide (CsI) was purchased from Aladdin, PTAA, Lead iodide (PbI<sub>2</sub>), Formamidinium iodide (FAI), Formamidinium bromide (FABr), Lead chloride (PbCl<sub>2</sub>), PCBM, BCP were purchased from Xi'an Polymer Light Technology Corp. Dimethylsulfoxide (DMSO, 99.8%), chlorobenzene (CB, 99.8%) and N, N'-dimethylformamide (DMF, 99.8%) were purchased from Alfa, and TPEE was purchased from DuPont Company. PEN/ITO and glass/ITO substrates were purchased from Advanced Election Technology Co., Ltd.

### **Device Fabrication:**

The PTAA (2 mg/mL in CB) solution was spin-coated onto the PEN/ITO substrate at a speed of 4000 rpm for 30 s. The perovskite precursor solution was prepared by dissolving 591.3 mg PbI<sub>2</sub>, 185.7 mg FAI, 18.8 mg PbCl<sub>2</sub>, 8.5 mg FABr, and 52.6 mg CsI in a mixed solvent of 800  $\mu$ l DMF and 200  $\mu$ l of DMSO, and it was stirred at 65 °C for 2 hours. After the solution was completely dissolved and filtered, 60  $\mu$ l of perovskite solution was spin-coated onto the PTAA film at a speed of 1000 rpm for 10 s and 4000 rpm for 25 s. In this process, CB as an anti-solvent was added dropwise within 30 s. After annealing at 110 °C for 1 min and natural cooling, different concentrations (1-10 mg/mL, the solvent is chlorobenzene) of TPEE (5000 rpm for 15 s) were spin-coated onto the perovskite film and annealed at 110 °C for 19

min. Then, the PCBM solution (20 mg/mL in CB) and BCP (0.5 mg/mL in ethanol) were spin-coated onto the TPEE film. At last, a 100 nm silver electrode was deposited by thermal evaporation. The effective area of the PSCs is 0.0725 cm<sup>2</sup>. The preparation process of the test samples is the same as that of the device preparation before evaporation.

### Calculation formula:

The bending test: For the multilayer films, the relationship between film stress and curvature radius is shown as follows:  $\sigma_f = \frac{E_f h_f^2}{6(1 - \nu_s)R}$ ,  $\sigma_f$  is the value of stress,  $E_f$  is Young's modulus of film,  $h_f$  is the thickness of the film,  $\nu_s$  is the Poisson's ratio of film and  $R$  is curvature radius.

Trap density calculation: The formula for calculating the trap density is  $N_{\text{trap}} = 2\varepsilon_r \varepsilon_0 V_{TFL} / qL^2$ , where  $V_{TFL}$  refers to the starting voltage of the trap filling limit,  $q$  is the basic charge of the electron ( $q = 1.6 \times 10^{-19}$  C),  $L$  is the thickness of perovskite layer,  $\varepsilon_0$  is the vacuum permittivity ( $\varepsilon_0 = 8.854 \times 10^{-12}$  F/m), and  $\varepsilon_r$  is the relative dielectric constant.

$V_{oc}$  and  $J_{sc}$  as a function of incident light intensity ( $I$ ) are fitted via the following equations:  $J_{sc} \propto I^\alpha$ , and  $V_{oc} = nkT \ln(I)/q + \text{constant}$ , respectively.  $k$  represents the Boltzmann constant,  $q$  is the elementary charge,  $T$  is absolute temperature, and  $\alpha$  and  $n$  represent factors related to bimolecular and monomolecular recombination, respectively.

### **Measurement and Characterization:**

The scanning electron microscope images were measured by a scanning electron microscope (Hitachi SU8010). The current density-voltage curves were obtained by a programmable Keithley 2400 source meter at  $100 \text{ mW}\cdot\text{cm}^{-2}$  under AM 1.5 G solar irradiation (SAN-EI, AAA Class Solar Simulator, XES-70S1). The X-ray diffraction patterns were measured by an X-ray diffractometer (Bruker D8 Advance). The optical transmission spectrum was measured by Lambda 750S. The incident photo-to-current efficiency curve was performed by QE-R3018. The Pb 4f and I 3d were characterized by X-ray photoelectron spectroscopy (Thermo Fisher, Escalab 250Xi). The topography and modulus of the films were obtained by atomic force microscopy (Bruker Dimension Icon). The probe Tap300A (Nanoworld Co., Ltd, thickness:  $4 \text{ }\mu\text{m}$ , length:  $125 \text{ }\mu\text{m}$ , width:  $30 \text{ }\mu\text{m}$ , resonance frequency:  $300 \text{ kHz}$ ) was used for mechanical AFM test, with a nominal spring constant  $k = 40 \text{ N/m}$ , and it is suitable for a studied modulus range from  $0.2 \text{ GPa}$  up to tens of  $\text{GPa}$ . The deflection sensitivity was measured with a sapphire surface. The scanning size was  $2 \times 2 \text{ }\mu\text{m}^2$  for all the measurements. The maximum force in PeakForce Quantitative Nanomechanical Mapping mode ranged from  $50$  to  $250 \text{ nN}$ . The steady-state and time-resolved PL spectra were measured by FLS 1000 (Edinburgh Instruments Co., Ltd). The bending tests of the f-PSCs used a set of an assembled electric linear sliding table (Zolix Instruments Co., Ltd). Stress-strain tests used a high-performance motorized test stand (ESM303).

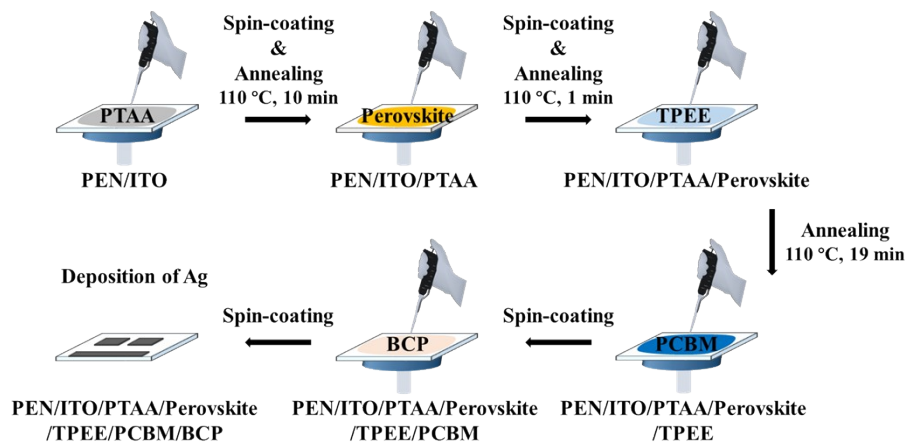

Fig. S1. Schematic diagram of the device fabrication process.

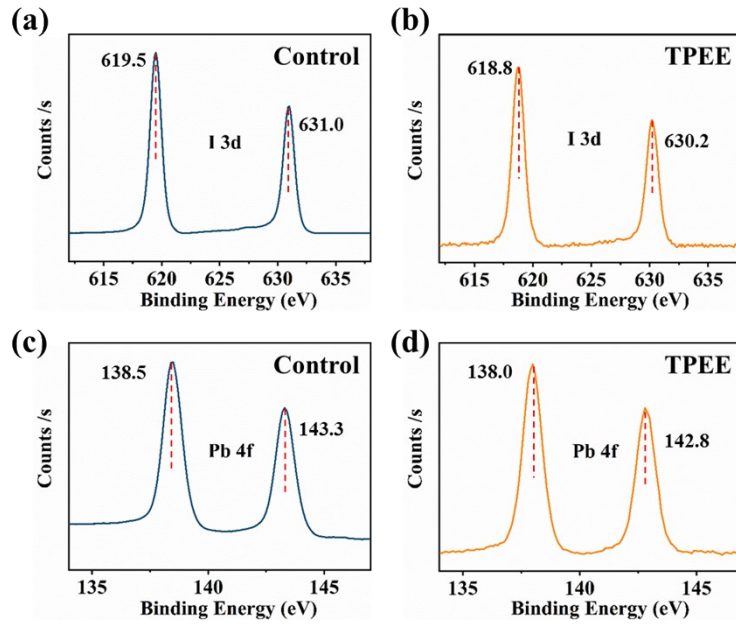

Fig. S2. X-ray photoelectron spectroscopy spectra of I element in the (a) control and (b) TPEE-coated perovskite film and Pb element in the (c) control and (d) TPEE-coated perovskite film.

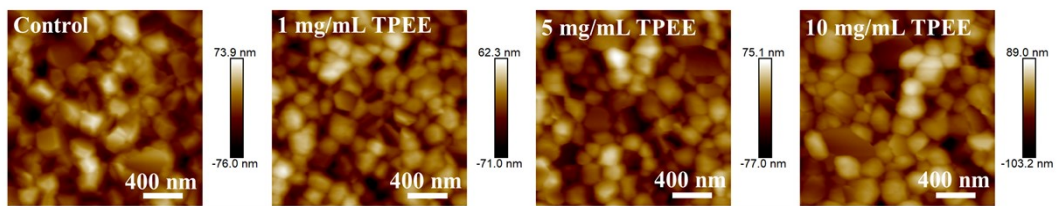

Fig. S3. Height AFM images of (a) control perovskite film, (b-d) different concentrations of TPEE coated on perovskite films.

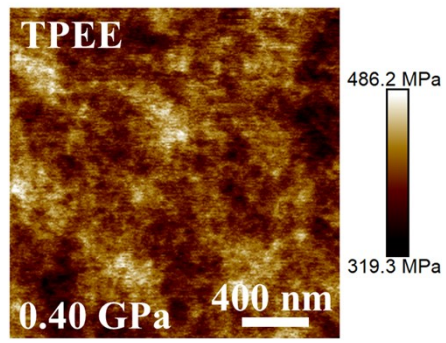

Fig. S4. Mechanical AFM image of TPEE film.



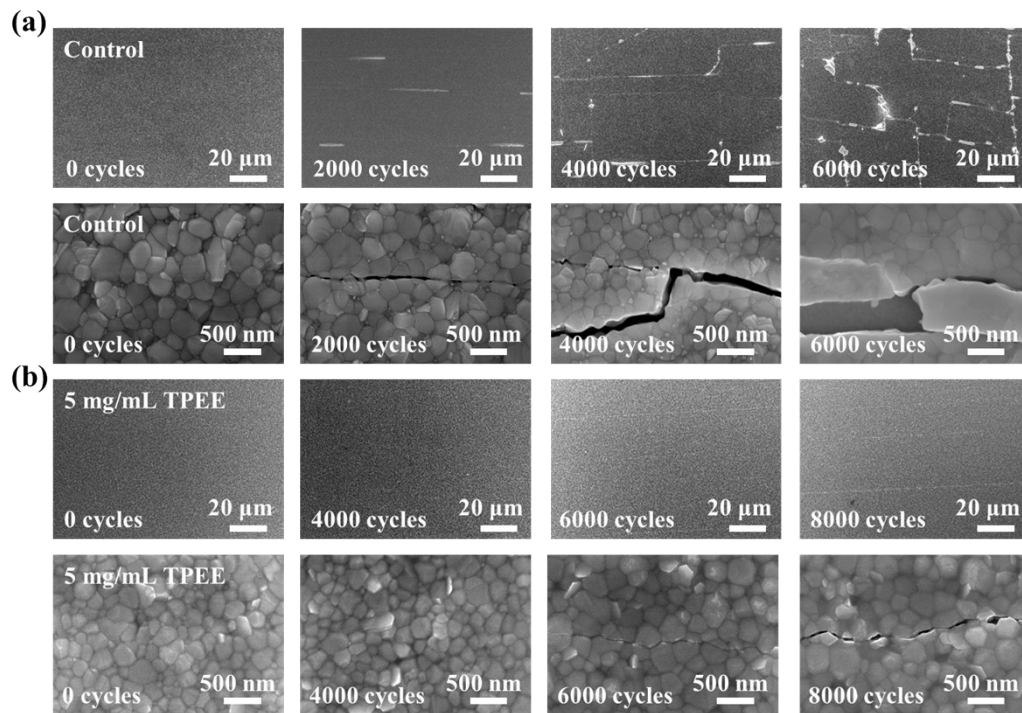

Fig. S5. SEM images of (a) the control perovskite film and (b) TPEE-coated perovskite film bend for different cycles at a 2 mm curvature radius.

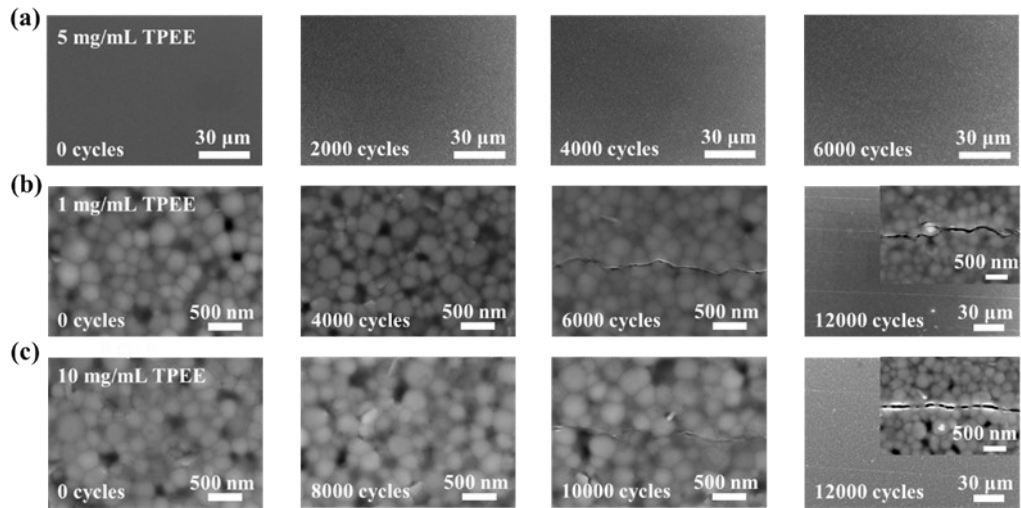

Fig. S6. SEM images of the perovskite/TPEE/PCBM film bent for different cycles at a 2 mm curvature radius. The concentration of TPEE is (a) 5 mg/mL, (b) 1 mg/mL, and (c) 10 mg/mL.

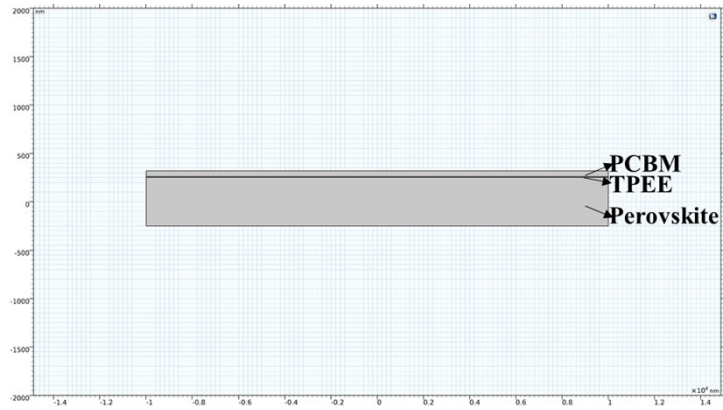

Fig. S7. The geometric model for bending simulation in finite element analysis. The design of this two-dimensional model is proportional, and the size of the geometric unit is 250 nm, which can match the grain size of perovskite films.

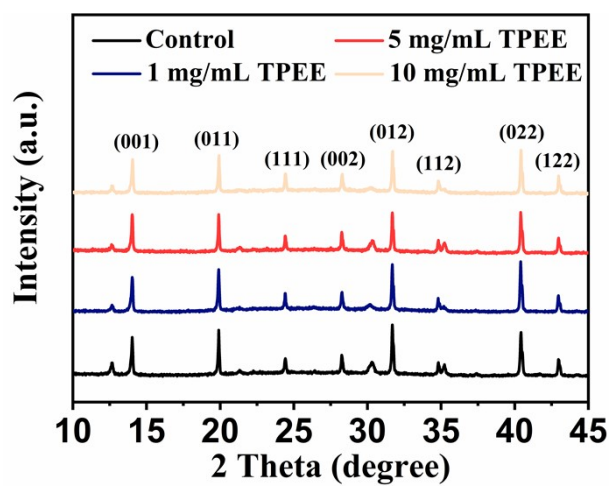

Fig. S8. X-ray diffraction patterns of the control and TPEE-coated perovskite films.

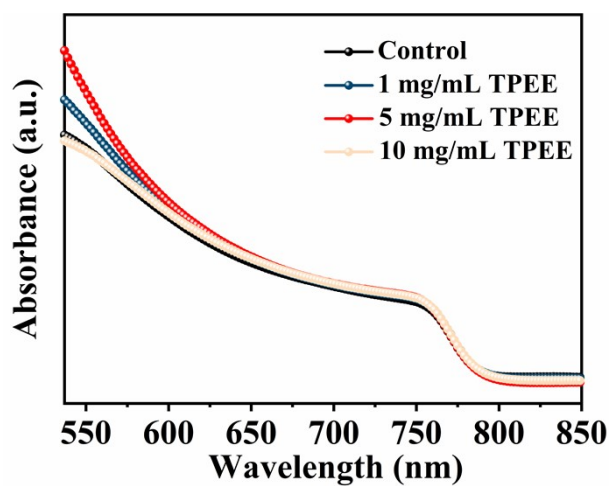

Fig. S9. Absorption spectra of the control and TPEE-coated perovskite films.

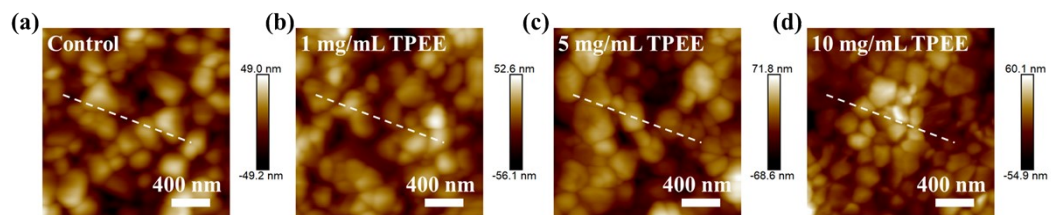

Fig. S10. Height AFM images of (a) control perovskite film, (b-d) different concentrations of TPEE coated on perovskite films.

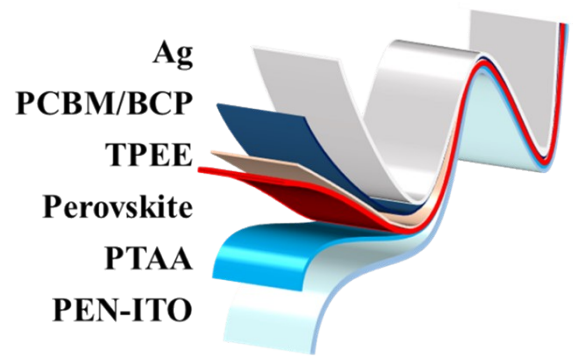

Fig. S11. Schematic diagram of the f-PSCs structure (PEN/ITO/poly(triarylamine) (PTAA)/perovskite/TPEE/PCBM)/bathocuproine (BCP)/Ag).

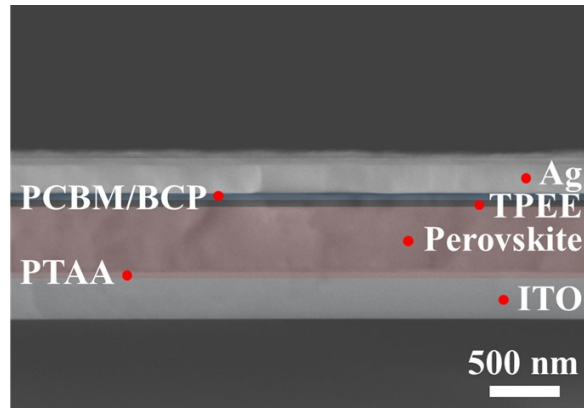

Fig. S12. SEM cross-section images of the TPEE-based f-PSCs.



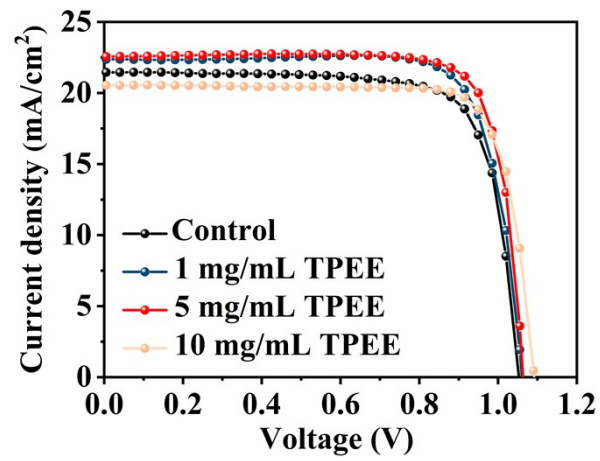

Fig. S13.  $J$ - $V$  curves of the champion PCE of the f-PSCs based on different concentrations of TPEE.

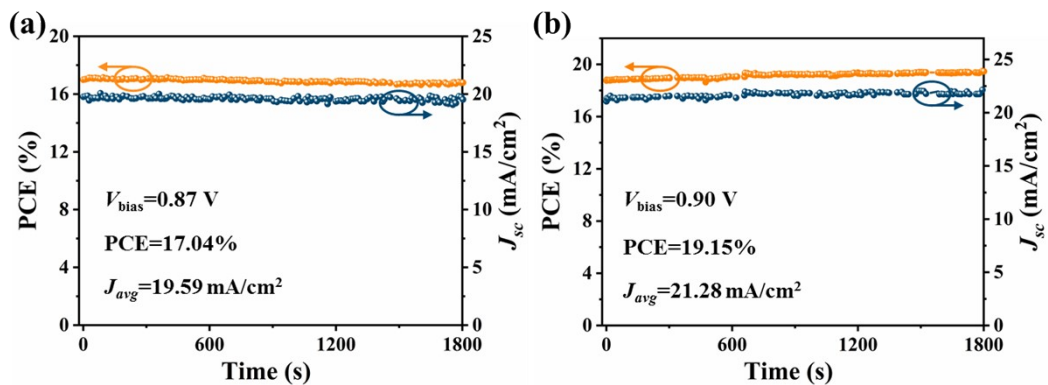

Fig. S14. (a) Steady-state average photocurrent and average output PCE of the control f-PSCs were measured under a constant bias voltage (0.87 V) near the maximum power point for 1800 s. (b) Steady-state average photocurrent and average output PCE of the TPEE-based f-PSCs were measured under a constant bias voltage (0.90 V) near the maximum power point for 1800 s.

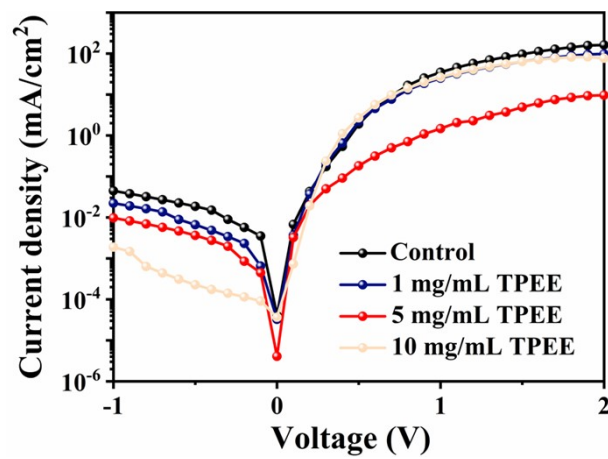

Fig. S15. Dark  $J$ - $V$  curves of the devices based on different concentrations of TPEE.

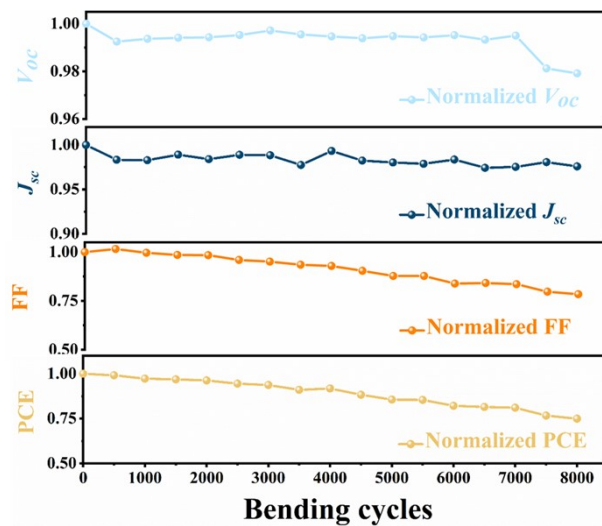

Fig. S16. The main photovoltaic parameters of the control f-PSCs with different bending cycles at a 2 mm curvature radius.

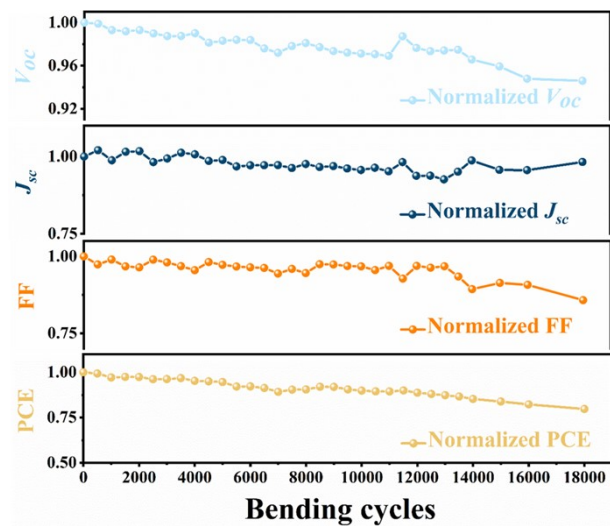

Fig. S17. The main photovoltaic parameters of the TPEE-based f-PSCs with different bending cycles at a 2 mm curvature radius.

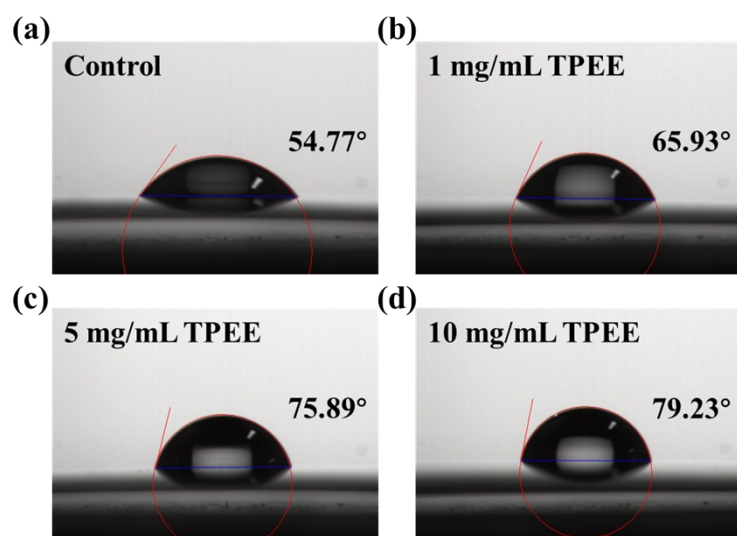

Fig. S18. (a-d) Water contact angles of perovskite films coated with different concentrations of TPEE.

Table S1. Physical parameters of different materials for finite element simulation.

| Material   | Thickness (nm) | Young's Modulus (GPa) | Density ( $\rho$ , g/cm <sup>3</sup> ) | Poisson's ratio |
|------------|----------------|-----------------------|----------------------------------------|-----------------|
| Perovskite | 500            | 5.23                  | 4.15                                   | 0.33            |
| TPEE       | 10             | 0.40                  | 1.15                                   | 0.42            |
| PCBM       | 60             | 3.78                  | 1.60                                   | 0.36            |

Table S2. The full width at half maxima (FWHM) of the (001) crystal orientation for the control and TPEE-coated perovskite films.

| Sample        | FWHM (°) |
|---------------|----------|
| Control       | 0.151    |
| 1 mg/mL TPEE  | 0.143    |
| 5 mg/mL TPEE  | 0.136    |
| 10 mg/mL TPEE | 0.142    |



Table S3. Trap density of control device and devices based on different concentrations of TPEE.

| Sample        | $N_{trap} (\text{cm}^{-3})$ |
|---------------|-----------------------------|
| Control       | $6.81 \times 10^{15}$       |
| 1 mg/mL TPEE  | $5.63 \times 10^{15}$       |
| 5 mg/mL TPEE  | $3.93 \times 10^{15}$       |
| 10 mg/mL TPEE | $5.89 \times 10^{15}$       |

Table S4. Detailed photovoltaic parameters of control f-PSCs and TPEE-based f-PSCs.

| Sample        | $V_{oc}$<br>(V) | $J_{sc}$<br>(mA/cm <sup>2</sup> ) | FF<br>(%) | PCE<br>(%) |
|---------------|-----------------|-----------------------------------|-----------|------------|
| Control       | 1.05            | 21.45                             | 76.87     | 17.36      |
| 1 mg/mL TPEE  | 1.06            | 22.37                             | 78.67     | 18.71      |
| 5 mg/mL TPEE  | 1.07            | 22.55                             | 80.44     | 19.38      |
| 10 mg/mL TPEE | 1.09            | 20.54                             | 80.33     | 18.02      |

Table S5. Photovoltaic parameters for different cycles of control f-PSCs bending at a 2 mm curvature radius.

| Bending cycles | $V_{oc}$<br>(V) | $J_{sc}$<br>(mA/cm <sup>2</sup> ) | FF<br>(%) | PCE<br>(%) |
|----------------|-----------------|-----------------------------------|-----------|------------|
| 0              | 1.0698          | 19.7918                           | 78.9340   | 16.7134    |
| 500            | 1.0618          | 19.4623                           | 80.1920   | 16.5722    |
| 1000           | 1.0630          | 19.4515                           | 78.6203   | 16.2564    |
| 1500           | 1.0634          | 19.5758                           | 77.7649   | 16.1897    |
| 2000           | 1.0637          | 19.4756                           | 77.6715   | 16.0915    |
| 2500           | 1.0647          | 19.5716                           | 75.7500   | 15.7851    |
| 3000           | 1.0667          | 19.5628                           | 75.0516   | 15.6623    |
| 3500           | 1.0649          | 19.3462                           | 73.8107   | 15.2076    |
| 4000           | 1.0641          | 19.6560                           | 73.3477   | 15.3417    |
| 4500           | 1.0632          | 19.4423                           | 71.3361   | 14.7471    |
| 5000           | 1.0642          | 19.4006                           | 69.2907   | 14.3069    |
| 5500           | 1.0636          | 19.3717                           | 69.2621   | 14.2715    |
| 6000           | 1.0646          | 19.4673                           | 66.2112   | 13.7231    |
| 6500           | 1.0626          | 19.2833                           | 66.4289   | 13.6127    |
| 7000           | 1.0644          | 19.3027                           | 65.9637   | 13.5539    |
| 7500           | 1.0497          | 19.4097                           | 62.9005   | 12.8166    |
| 8000           | 1.0475          | 19.3139                           | 61.9065   | 12.5246    |

Table S6. Photovoltaic parameters for different cycles of TPEE-based f-PSCs bending at a 2 mm curvature radius.

| Bending cycles | $V_{oc}$<br>(V) | $J_{sc}$<br>(mA/cm <sup>2</sup> ) | FF<br>(%) | PCE<br>(%) |
|----------------|-----------------|-----------------------------------|-----------|------------|
| <b>0</b>       | 1.0772          | 21.4292                           | 77.7166   | 17.9409    |
| <b>500</b>     | 1.0761          | 21.8758                           | 75.6938   | 17.8191    |
| <b>1000</b>    | 1.0697          | 21.1712                           | 76.9226   | 17.4207    |
| <b>1500</b>    | 1.0685          | 21.7635                           | 75.2019   | 17.4886    |
| <b>2000</b>    | 1.0697          | 21.8019                           | 74.9418   | 17.4778    |
| <b>2500</b>    | 1.0663          | 21.0497                           | 76.8739   | 17.2552    |
| <b>3000</b>    | 1.0637          | 21.2998                           | 76.2032   | 17.2652    |
| <b>3500</b>    | 1.0639          | 21.6980                           | 75.2540   | 17.3721    |
| <b>4000</b>    | 1.0665          | 21.5891                           | 74.2429   | 17.0957    |
| <b>4500</b>    | 1.0571          | 21.1312                           | 76.2815   | 17.0409    |
| <b>5000</b>    | 1.0590          | 21.2007                           | 75.6020   | 16.9752    |
| <b>5500</b>    | 1.0600          | 20.7485                           | 75.1629   | 16.5322    |
| <b>6000</b>    | 1.0598          | 20.8242                           | 74.9639   | 16.5447    |
| <b>6500</b>    | 1.0514          | 20.8274                           | 74.8149   | 16.3830    |
| <b>7000</b>    | 1.0471          | 20.8371                           | 73.3703   | 16.0084    |
| <b>7500</b>    | 1.0537          | 20.6421                           | 74.5691   | 16.2201    |
| <b>8000</b>    | 1.0568          | 20.9107                           | 73.5141   | 16.2457    |
| <b>8500</b>    | 1.0527          | 20.7034                           | 75.7536   | 16.5107    |
| <b>9000</b>    | 1.0487          | 20.7727                           | 75.6921   | 16.4900    |
| <b>9500</b>    | 1.0472          | 20.6024                           | 75.2941   | 16.2453    |
| <b>10000</b>   | 1.0463          | 20.4945                           | 75.2053   | 16.1269    |
| <b>10500</b>   | 1.0456          | 20.6595                           | 74.2727   | 16.0454    |
| <b>11000</b>   | 1.0439          | 20.4028                           | 75.3058   | 16.0395    |
| <b>11500</b>   | 1.0635          | 21.0490                           | 72.0989   | 16.1404    |
| <b>12000</b>   | 1.0519          | 20.0959                           | 75.3233   | 15.9231    |
| <b>12500</b>   | 1.0486          | 20.1074                           | 74.8721   | 15.7872    |
| <b>13000</b>   | 1.0493          | 19.8461                           | 75.2178   | 15.6641    |
| <b>13500</b>   | 1.0500          | 20.3769                           | 72.6234   | 15.5396    |
| <b>14000</b>   | 1.0403          | 21.1665                           | 69.4617   | 15.2965    |
| <b>15000</b>   | 1.0334          | 20.5094                           | 71.0110   | 15.0515    |
| <b>16000</b>   | 1.0211          | 20.4923                           | 70.5347   | 14.7598    |
| <b>18000</b>   | 1.0190          | 21.0515                           | 66.6865   | 14.3066    |

Table S7. The summary of normalized PCE and different bending conditions of recently reported f-PSCs. The colorful circles represent different references corresponding to Fig. 5i.

| Device structure                                                                                | PCE (%) | Mechanical durability                   | Normalized PCE | Reference   |
|-------------------------------------------------------------------------------------------------|---------|-----------------------------------------|----------------|-------------|
| PEN/ITO/PTAA/Perovskite/<br>TPEE/PC <sub>61</sub> BM/BCP/Ag                                     | 19.38   | Bending at 2 mm radius for 10000 cycles | 0.90           | ★ This work |
| PEN/ITO/PTAA/Perovskite/<br>TPEE/PC <sub>61</sub> BM/BCP/Ag                                     | 19.38   | Bending at 2 mm radius for 18000 cycles | 0.80           | ★ This work |
| PET/ITO/NiO <sub>x</sub> /PMMA<br>/perovskite/PC <sub>61</sub> BM<br>/BCP/Ag                    | 20.01   | Bending at 5 mm radius for 1000 cycles  | 0.90           | ● [1]       |
| PEN/ITO/PEDOT:PSS<br>/PTAA/Perovskite<br>/PC <sub>61</sub> BM/BCP/Ag                            | 19.41   | Bending at 3 mm radius for 1000 cycles  | 0.84           | ● [2]       |
| PET/ITO/RT-SnO <sub>2</sub><br>/Perovskite<br>/Spiro-OMeTAD/Au                                  | 19.30   | Bending at 5 mm radius for 10000 cycles | 0.91           | ● [3]       |
| PET/Ni mesh-PH1000<br>/PEDOT:PSS-NiO <sub>x</sub><br>/Perovskite/PC <sub>61</sub> BM/BCP/A<br>g | 17.30   | Bending at 4 mm radius for 2000 cycles  | 0.76           | ● [4]       |
| PEN/ITO/SnO <sub>2</sub> /Y6<br>/Perovskite/SpiroOMeTAD/<br>MoO <sub>3</sub> /Au                | 20.09   | Bending at 8 mm radius for 1000 cycles  | 0.80           | ● [5]       |

|                                                                               |       |                                                  |      |                                                                                       |      |
|-------------------------------------------------------------------------------|-------|--------------------------------------------------|------|---------------------------------------------------------------------------------------|------|
| PET/ITO/PEDOT:EVA<br>/Perovskite/PC <sub>61</sub> BM<br>/BCP/Ag               | 19.87 | Bending at 3<br>mm radius<br>for 7000<br>cycles  | 0.85 |    | [6]  |
| PEN/ITO/FI-SnO <sub>2</sub><br>/Perovskite<br>/Spiro-OMeTAD/Au                | 20.10 | Bending at 3<br>mm radius<br>for 2500<br>cycles  | 0.85 |    | [7]  |
| PET/ITO/SnO <sub>2</sub> /Perovskite/<br>Spiro-OMeTAD/Au                      | 21.00 | Bending at 5<br>mm radius<br>for 10000<br>cycles | 0.90 |    | [8]  |
| PEN/ITO/Bio-IL<br>/Perovskite<br>/PC <sub>61</sub> BM/BCP/Ag                  | 21.08 | Bending at 3<br>mm radius<br>for 2000<br>cycles  | 0.84 |   | [9]  |
| PEN/ITO/NiO <sub>x</sub> /Perovskite/S<br>piro-OMeTAD/Au                      | 18.50 | Bending at 7<br>mm radius<br>for 1200<br>cycles  | 0.80 |  | [10] |
| PEN/ITO/SnO <sub>2</sub> -TiO <sub>2</sub><br>/Perovskite/Spiro-<br>OMeTAD/Au | 21.02 | Bending at 5<br>mm radius<br>for 500<br>cycles   | 0.90 |  | [11] |
| PEN/ITO/NiO <sub>x</sub> :PDA<br>/Perovskite<br>/PC <sub>61</sub> BM/BCP/Ag   | 16.23 | Bending at 8<br>mm radius<br>for 5000<br>cycles  | 0.72 |  | [12] |
| PET/ITO/PEDOT:GO<br>/Perovskite<br>/PC <sub>61</sub> BM/Ag                    | 19.70 | Bending at 3<br>mm radius<br>for 5000<br>cycles  | 0.85 |  | [13] |

---

- [1] P. Ru, E. Bi, Y. Zhang, Y. Wang, W. Kong, Y. Sha, W. Tang, P. Zhang, Y. Wu, W. Chen, X. Yang, H. Chen, L. Han, High Electron Affinity Enables Fast Hole Extraction for Efficient Flexible Inverted Perovskite Solar Cells. *Adv. Energy Mater.* 10 (2020) 1903487.
- [2] Z. Wang, L. Zeng, C. Zhang, Y. Lu, S. Qiu, C. Wang, C. Liu, L. Pan, S. Wu, J. Hu, G. Liang, P. Fan, H. J. Egelhaaf, C. J. Brabec, F. Guo, Y. Mai, Rational Interface Design and Morphology Control for Blade-Coating Efficient Flexible Perovskite Solar Cells with a Record Fill Factor of 81%. *Adv. Funct. Mater.* 30 (2020) 2001240.
- [3] J. X. Zhong, W. Q. Wu, Y. Zhou, Q. Dong, P. Wang, H. Ma, Z. Wang, C. Y. Yao, X. Chen, G. I. Liu, Y. Shi, D. B. Kuang, Room Temperature Fabrication of SnO<sub>2</sub> Electrodes Enabling Barrier-Free Electron Extraction for Efficient Flexible Perovskite Photovoltaics. *Adv. Funct. Mater.* 32 (2022) 2200817.
- [4] M. Li, W. W. Zuo, A. G. Ricciardulli, Y. G. Yang, Y. H. Liu, Q. Wang, K. L. Wang, G. X. Li, M. Saliba, D. Di Girolamo, A. Abate, Z. K. Wang, Embedded Nickel-Mesh Transparent Electrodes for Highly Efficient and Mechanically Stable Flexible Perovskite Photovoltaics: Toward a Portable Mobile Energy Source. *Adv. Mater.* 32 (2020) 2003422.
- [5] H. Liu, Z. Zhang, Z. Su, W. Zuo, Y. Tang, F. Yang, X. Zhang, C. Qin, J. Yang, Z. Li, M. Li, Semi-Planar Non-Fullerene Molecules Enhance the Durability of Flexible Perovskite Solar Cells. *Adv. Sci.* 9 (2022) 2105739.
- [6] X. Meng, Z. Cai, Y. Zhang, X. Hu, Z. Xing, Z. Huang, Z. Huang, Y. Cui, T. Hu, M. Su, X. Liao, L. Zhang, F. Wang, Y. Song, Y. Chen, Bio-inspired vertebral design for scalable and flexible perovskite solar cells. *Nat. Commun.* 11 (2020) 3016.
- [7] Q. Dong, C. Zhu, M. Chen, C. Jiang, J. Guo, Y. Feng, Z. Dai, S. K. Yadavalli, M. Hu, X. Cao, Y. Li, Y. Huang, Z. Liu, Y. Shi, L. Wang, N. P. Padture, Y. Zhou, Interpenetrating interfaces for efficient perovskite solar cells with high operational stability and mechanical robustness. *Nat. Commun.* 12 (2021) 973.
- [8] Q. Dong, M. Chen, Y. Liu, F. T. Eickemeyer, W. Zhao, Z. Dai, Y. Yin, C. Jiang, J. Feng, S. Jin, S. Liu, S. M. Zakeeruddin, M. Grätzel, N. P. Padture, Y. Shi, Flexible perovskite solar cells with simultaneously improved efficiency, operational stability, and mechanical reliability. *Joule* 5 (2021) 1587-1601.
- [9] B. Fan, J. Xiong, Y. Zhang, C. Gong, F. Li, X. Meng, X. Hu, Z. Yuan, F. Wang, Y. Chen, A Bionic Interface to Suppress the Coffee-Ring Effect for Reliable and Flexible Perovskite Modules with a Near-90% Yield Rate. *Adv. Mater.* 34 (2022) 2201840.
- [10] W. Deng, F. Li, J. Li, M. Wang, Y. Hu, M. Liu, Anti-solvent free fabrication of FA-Based perovskite at low temperature towards to high performance flexible perovskite solar cells. *Nano Energy* 70 (2020) 104505.
- [11] M. J. Paik, J. W. Yoo, J. Park, E. Noh, H. Kim, S.-G. Ji, Y. Y. Kim, S. I. Seok, SnO<sub>2</sub>-TiO<sub>2</sub> Hybrid Electron Transport Layer for Efficient and Flexible Perovskite Solar Cells. *ACS Energy Lett.* 7 (2022) 1864-1870.
- [12] X. Duan, X. Li, L. Tan, Z. Huang, J. Yang, G. Liu, Z. Lin, Y. Chen, Controlling

Crystal Growth via an Autonomously Longitudinal Scaffold for Planar Perovskite Solar Cells. *Adv. Mater.* 32 (2020) 2000617.

- [13] T. Xue, G. Chen, X. Hu, M. Su, Z. Huang, X. Meng, Z. Jin, J. Ma, Y. Zhang, Y. Song, Mechanically Robust and Flexible Perovskite Solar Cells via a Printable and Gelatinous Interface. *ACS Appl. Mater. Inter.* 13 (2021) 19959-19969.
